# Supplementary material
Source: PubMed Central journal article supplement (PMC5014281)
Supplement: SD7.pdf [file SD7.pdf]

SUPPLEMENTAL TABLE 1  
Fecal markers in asymptomatic stool and subsequent 6-month change in LAZ

|                |                    | Months 3–18 (N = 232)                  |  |
|----------------|--------------------|----------------------------------------|--|
|                |                    | Coefficient (95% CI)                   |  |
| AAT (940)      | Low                | Ref                                    |  |
|                | Medium             | 0.031 (–0.036 to 0.097)                |  |
|                | High               | 0.018 (–0.060 to 0.097)                |  |
|                | Diarrhea incidence | –0.015 (–0.033 to 0.003)               |  |
|                | Constant           | –0.342 <sup>‡</sup> (–0.439 to –0.244) |  |
| MPO (932)      | Low                | Ref                                    |  |
|                | Medium             | 0.045 (–0.023 to 0.113)                |  |
|                | High               | –0.015 (–0.095 to 0.065)               |  |
|                | Diarrhea incidence | –0.015 (–0.033 to 0.003)               |  |
|                | Constant           | –0.331 <sup>‡</sup> (–0.433 to –0.230) |  |
| NEO (937)      | Low                | Ref                                    |  |
|                | Medium             | 0.033 (–0.035 to 0.101)                |  |
|                | High               | 0.003 (–0.075 to 0.080)                |  |
|                | Diarrhea incidence | –0.016 (–0.034 to 0.002)               |  |
|                | Constant           | –0.338 <sup>‡</sup> (–0.435 to –0.241) |  |
| EE score (929) | Score (0–10)       | 0.000 (–0.013 to 0.012)                |  |
|                | Diarrhea incidence | –0.015 (–0.033 to 0.003)               |  |
|                | Constant           | –0.316 <sup>‡</sup> (–0.429 to –0.204) |  |

AAT = alpha-1-antitrypsin; CI = confidence interval; EE = environmental enteropathy; LAZ = length-for-age z-score; MPO = myeloperoxidase; NEO = neopterin; Ref = reference.  
<sup>\*</sup>P < 0.05.  
<sup>†</sup>P < 0.01.  
<sup>‡</sup>P < 0.001.

SUPPLEMENTAL TABLE 2  
Fecal marker distribution from stool in Mirpur and multisite MAL-ED cohort<sup>18</sup>

|                | AAT (mg/g) |        | MPO (ng/mL) |         | NEO (nmol/L) |         |
|----------------|------------|--------|-------------|---------|--------------|---------|
|                | Multisite  | Mirpur | Multisite   | Mirpur  | Multisite    | Mirpur  |
| First quartile | 0.21       | 0.19   | 5,650.5     | 1,594.9 | 1,171.4      | 366.2   |
| Median         | 0.44       | 0.38   | 11,118.9    | 3,354.9 | 1,846.7      | 1,017.6 |
| Third quartile | 0.86       | 0.72   | 20,526.3    | 7,430.1 | 2,997.9      | 2,210.8 |
| N (samples)    | 1,169      | 1,194  | 916         | 1,185   | 954          | 1,190   |
| n (children)   | 537        | 246    | 537         | 246     | 537          | 246     |

AAT = alpha-1-antitrypsin; MAL-ED = malnutrition and enteric diseases; MPO = myeloperoxidase; NEO = neopterin.

SUPPLEMENTAL TABLE 3  
Fecal marker distribution by age

| Age (months) | AAT (mg/g) |                  | MPO (ng/mL) |                            | NEO (nmol/L) |                         |
|--------------|------------|------------------|-------------|----------------------------|--------------|-------------------------|
|              | n          | Median (IQR)     | n           | Median (IQR)               | n            | Median (IQR)            |
| 3            | 162        | 0.51 (0.28–0.93) | 161         | 6,817.5 (3,509.4–14,864.4) | 163          | 1,444.2 (717.0–2,456.4) |
| 6            | 139        | 0.42 (0.23–0.92) | 139         | 4,956.6 (2,745.9–10,745.3) | 138          | 1,522.8 (634.7–2,662.6) |
| 9            | 157        | 0.38 (0.19–0.65) | 154         | 4,133.1 (1,785.9–7,726.0)  | 155          | 1,662.7 (705.7–2,979.0) |
| 12           | 186        | 0.38 (0.22–0.78) | 183         | 6,561.8 (2,953.8–14,886.0) | 185          | 1,230.1 (529.1–2,356.6) |
| 15           | 172        | 0.32 (0.17–0.59) | 170         | 3,225.6 (1,219.9–5,520.5)  | 172          | 1,281.9 (437.0–2,689.2) |
| 18           | 187        | 0.36 (0.16–0.70) | 187         | 2,022.1 (1,341.7–3,312.2)  | 187          | 645.5 (268.3–1,351.8)   |
| 21           | 191        | 0.33 (0.17–0.59) | 191         | 1,859.0 (1,140.6–2,603.2)  | 190          | 456.3 (213.3–812.0)     |
| Total        | 1,194      | 0.38 (0.19–0.72) | 1,185       | 3,354.9 (1,594.9–7,430.1)  | 1,190        | 1,017.6 (366.2–2,210.8) |

AAT = alpha-1-antitrypsin; IQR = interquartile range; MPO = myeloperoxidase; NEO = neopterin.
